# Supplementary material
Source: PubMed Central journal article supplement (PMC2330302)
Supplement: plntphys_pp.107.110841_3.pdf [file plntphys_pp.107.110841_3.pdf]

## **Supplementary data legends**

*Supplementary Figure 1- Dose response curves for inhibitors utilized in microarray experiments.*

*Supplementary Figure 2- q-RT-PCR validation of microarray results.*

*Supplementary File 1- Gene lists from SAM, GO ontology analysis, TAGGIT ontology analysis and selected output from the seed eFP Browser.*

*Supplementary File 2- GO and TAGGIT ontology analyses of SAM selected germination responsive transcripts.*

*Supplementary File 3- Selected output from the seed eFP Browser. eFP output for genes mentioned in the text are presented in this file.*

*Supplementary File 4- Germination signature of Arabidopsis seeds. Venn intersections of the germination-responsive transcripts with the germinating and dormant transcriptional signatures (Carrera et al. 2007), and the ABA-responsive transcripts determined by SAM under the same conditions.*

*Supplementary File 5- Effects of the individual drug treatments based on genes showing a two-fold change or more in transcript abundance. TAGGIT ontological analysis of the genes affected by the individual drug treatments.*

*Supplementary File 6- Gene lists of nuclear-encoded components of photosynthesis that show an increase in transcript abundance during seed germination.*

*Supplementary File 7- qRT-PCR primers and reaction conditions*
