# Supplementary material
Source: PubMed Central journal article supplement (PMC2330302)

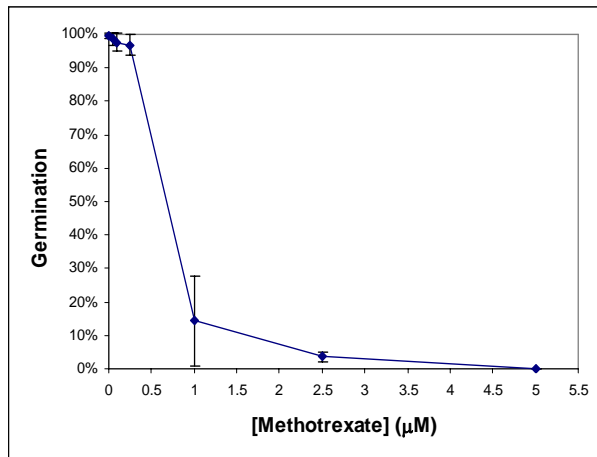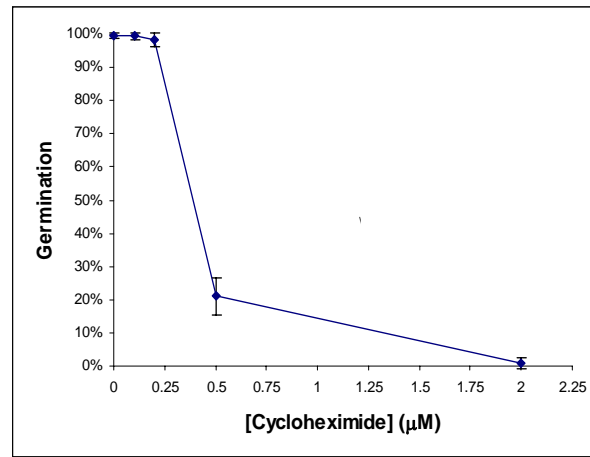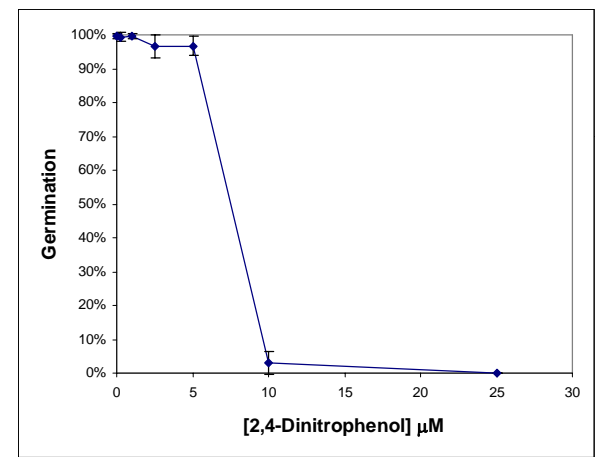

Supplement: plntphys_pp.107.110841_1.pdf [file plntphys_pp.107.110841_1.pdf]

A.

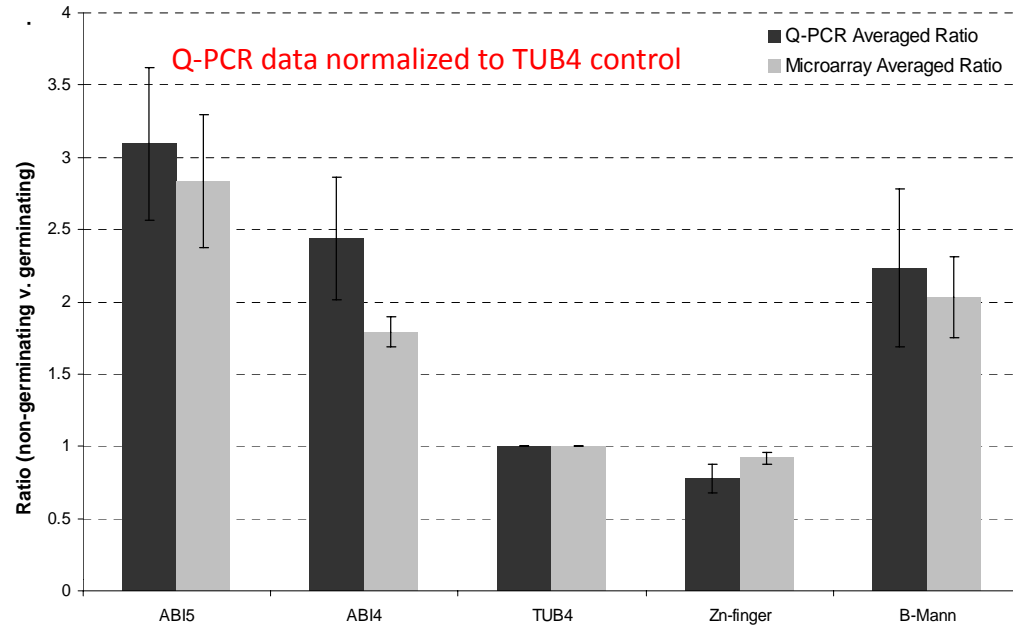

B.

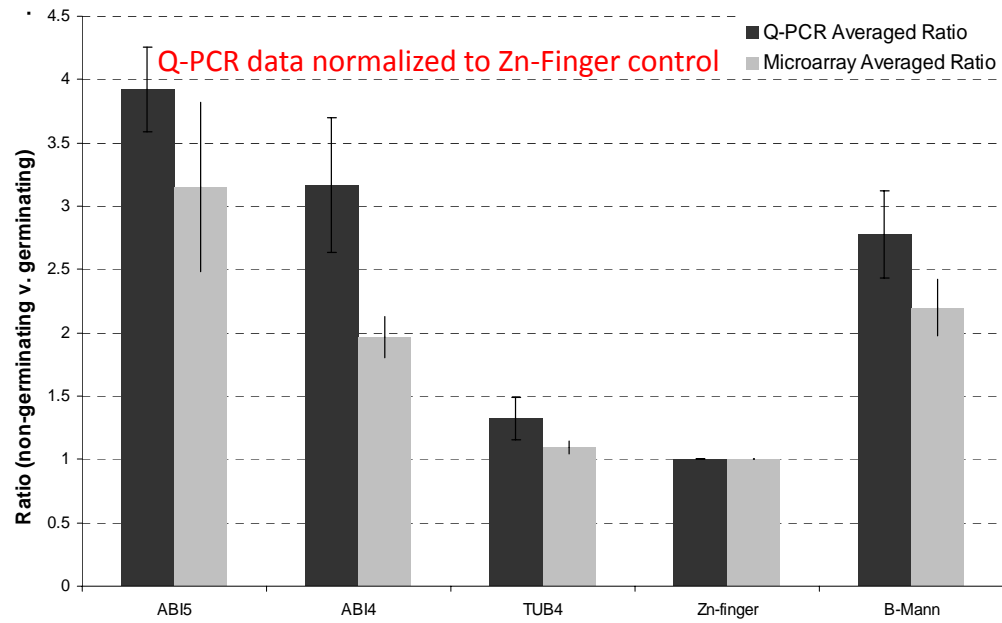

Supplement: plntphys_pp.107.110841_2.pdf [file plntphys_pp.107.110841_2.pdf]
